# Supplementary material
Source: HighWire-hosted journal article supplement (https://bmjopen.bmj.com/content/10/2/e036975)

## Gulliford et al. Supplementary Data

Supplementary Table 1: Outline of statistical models employed for analysis. (Please see text for further explanation).

|                |                                                                                                                                                                                                                                                                                      |
|----------------|--------------------------------------------------------------------------------------------------------------------------------------------------------------------------------------------------------------------------------------------------------------------------------------|
| <b>Model 1</b> | Antibiotic_count ~<br>year+year <sup>2</sup> +year <sup>3</sup> +age_group+gender+comorbidity+deprivation+region+offset=log(person-years)+random_intercept(family_practice), model=Poisson                                                                                           |
| <b>Model 2</b> | Serious_bacterial_infection_count ~<br>Family_Practice_AB_Prescribing_Estimate+Family_Practice_Consultations_Coded_Estimate+year+year <sup>2</sup> +year <sup>3</sup> +gender+age_group+deprivation+region+offset=log(person-years)+random_intercept(family_practice), model=Poisson |

## Gulliford et al. Supplementary Data

**Figure 1: Flowchart showing classification of antibiotic prescriptions 2002 to 2017. Figures are frequencies (percent of total number of antibiotic prescriptions).**

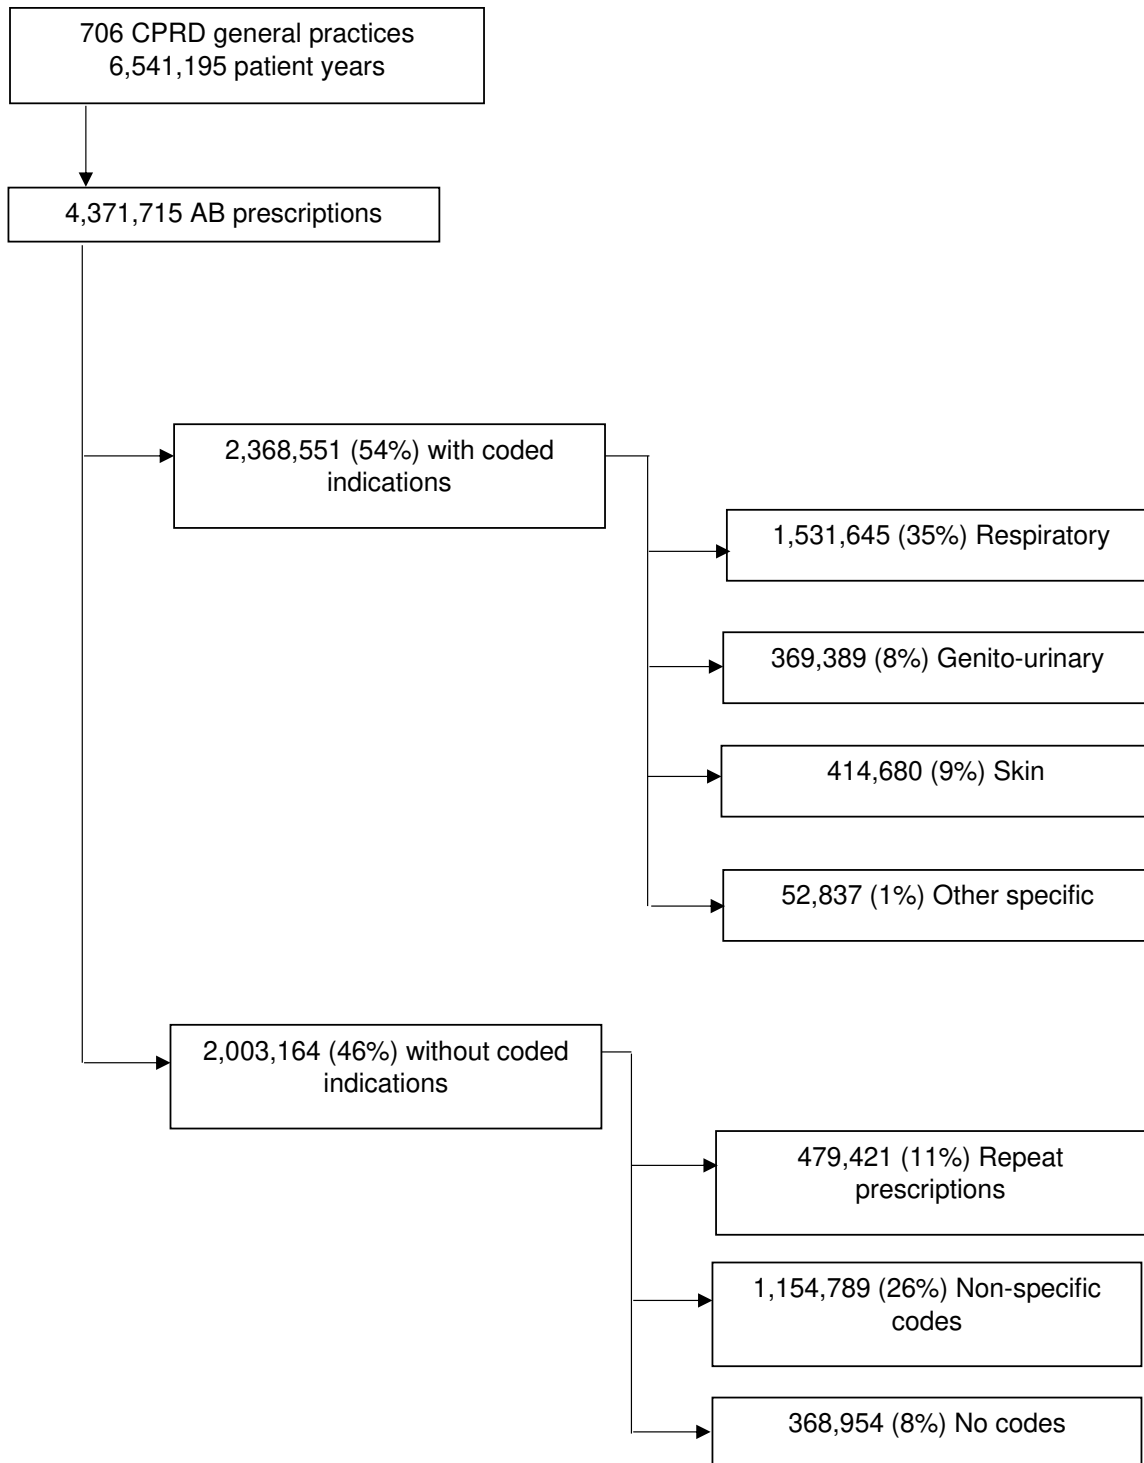

## Gulliford et al. Supplementary Data

**Supplementary Table 2: Characteristics of sample and antibiotic prescriptions by time period. Figures are frequencies (column percent).**

|                                                                | 2002 to 2006   | 2007 to 2012   | 2013 to 2017 |
|----------------------------------------------------------------|----------------|----------------|--------------|
| <b>Number of general practices</b>                             | 652            | 672            | 589          |
| <b>Number of patients contributing person time<sup>a</sup></b> | 548,558        | 576,985        | 439,627      |
| <b>Number of person years</b>                                  | 2,253,436      | 2,768,176      | 1,519,582    |
| Age 0 to 4                                                     | 275,539        | 313,806        | 104,688      |
| Age 5 to 14                                                    | 371,352        | 611,610        | 393,224      |
| Age 85+                                                        | 169,709        | 216,966        | 111,606      |
| Comorbidity present <sup>a</sup>                               | 835,565        | 1,147,828      | 686,777      |
| <b>Number of antibiotic prescriptions</b>                      | 1,422,009      | 1,941,102      | 1,008,604    |
| Acute AB prescriptions                                         | 1,289,615 (91) | 1,739,666 (90) | 863,013 (86) |
| for RTI                                                        | 534,535 (38)   | 705,262 (36)   | 291,848 (29) |
| for GUTI                                                       | 115,928 (8)    | 166,336 (9)    | 87,125 (9)   |
| for skin infection                                             | 137,936 (10)   | 184,420 (10)   | 92,324 (9)   |
| Other specific codes recorded                                  | 18,277 (1)     | 24,849 (1)     | 9,711 (1)    |
| Non-specific codes recorded                                    | 290,472 (20)   | 537,110 (28)   | 327,207 (32) |
| No codes recorded                                              | 192,467 (14)   | 121,689 (6)    | 54,798 (5)   |
| Repeat AB prescriptions                                        | 132,394 (9)    | 201,436 (10)   | 145,591 (15) |

<sup>a</sup> figures were rounded to nearest whole number; <sup>b</sup> based on seasonal-influenza risk status

## Gulliford et al. Supplementary Data

Supplementary Figure 2: Age-standardised antibiotic prescribing rates per 1,000 patient years for males and females from 2002 to 2017.

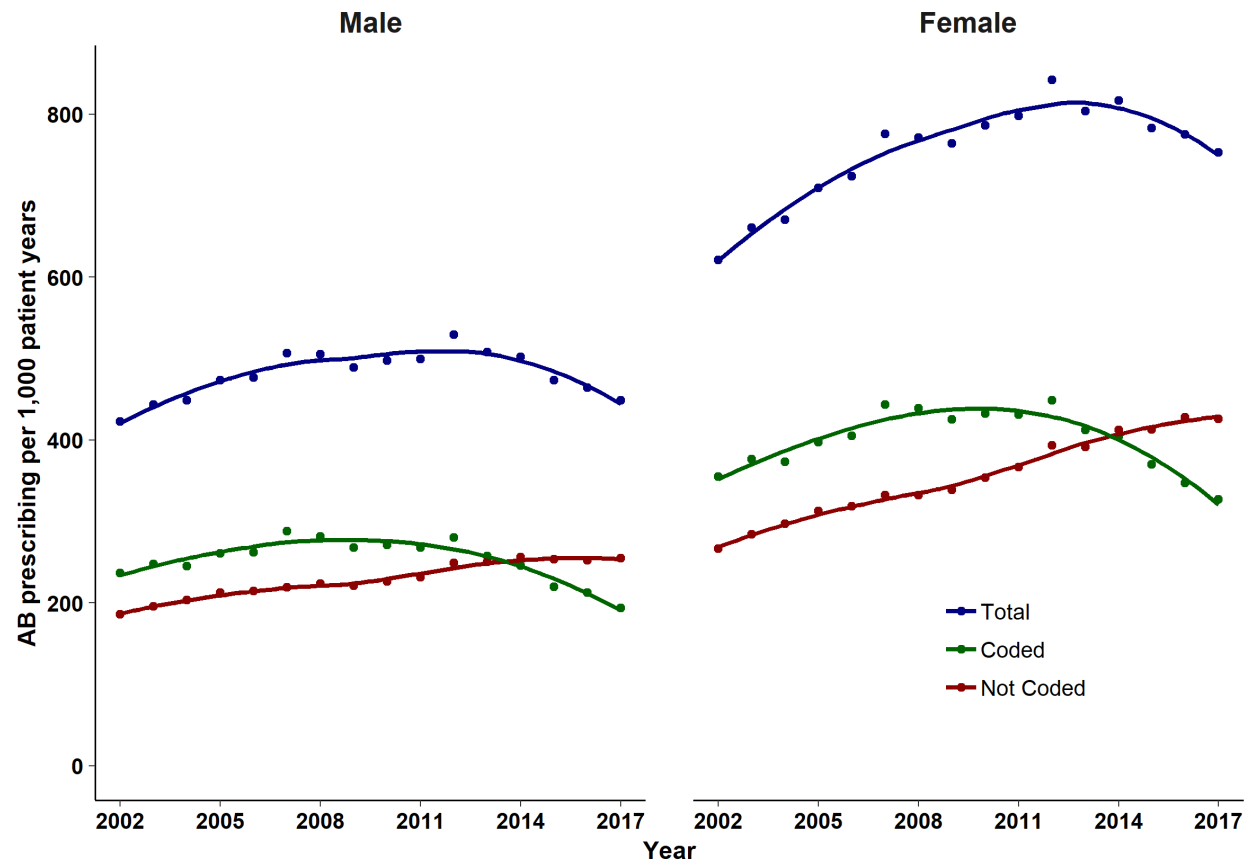

## Gulliford et al. Supplementary Data

**Supplementary Table 3: Distribution of serious bacterial infection events 2002 to 2017 by age-group and gender. Figures are frequencies.**

|                          | CNS infection | CVS infection | Kidney infection | Lung abscess / empyema | Mastoiditis | Osteomyelitis | Peritonsillar abscess | AB resistant infections | Sepsis | Septic arthritis |
|--------------------------|---------------|---------------|------------------|------------------------|-------------|---------------|-----------------------|-------------------------|--------|------------------|
| All                      | 576           | 1,697         | 30,827           | 2,932                  | 1,970       | 4,921         | 11,338                | 42,185                  | 39,059 | 4,254            |
| Male                     | 352           | 1,144         | 4,997            | 1,903                  | 814         | 3,055         | 6,021                 | 18,312                  | 18,999 | 2,496            |
| Female                   | 224           | 553           | 25,830           | 1,029                  | 1,156       | 1,866         | 5,317                 | 23,873                  | 20,060 | 1,758            |
| <b>Age-group (years)</b> |               |               |                  |                        |             |               |                       |                         |        |                  |
| 0 to 4                   | 11            | 20            | 198              | 138                    | 178         | 138           | 73                    | 576                     | 469    | 147              |
| 5 to 9                   | 17            | 18            | 386              | 106                    | 153         | 118           | 232                   | 409                     | 334    | 104              |
| 10 to 14                 | 17            | 17            | 474              | 60                     | 111         | 167           | 465                   | 308                     | 244    | 93               |
| 15 to 24                 | 47            | 42            | 6,140            | 106                    | 167         | 152           | 3,428                 | 1,528                   | 970    | 129              |
| 25 to 34                 | 38            | 92            | 5,523            | 149                    | 203         | 160           | 2,621                 | 2,444                   | 1,474  | 243              |
| 35 to 44                 | 65            | 146           | 5,176            | 294                    | 280         | 392           | 2,483                 | 3,089                   | 2,164  | 392              |
| 45 to 54                 | 115           | 189           | 4,519            | 438                    | 270         | 635           | 1,079                 | 4,001                   | 3,345  | 555              |
| 55 to 64                 | 105           | 274           | 3,725            | 561                    | 255         | 865           | 553                   | 5,045                   | 5,385  | 678              |
| 65 to 74                 | 90            | 407           | 2,562            | 525                    | 210         | 937           | 285                   | 8,252                   | 7,817  | 775              |
| 75 to 84                 | 58            | 365           | 1,548            | 423                    | 109         | 924           | 94                    | 9,469                   | 9,646  | 727              |
| 85+                      | 13            | 127           | 576              | 132                    | 34          | 433           | 24                    | 7,064                   | 7,211  | 411              |

## Gulliford et al. Supplementary Data

**Supplementary Table 4: Age- and sex-standardised incidence rates per 1,000 patient-years for serious bacterial infections by quartile of antibiotic prescribing.**

| Group                               | General practice antibiotic prescribing <sup>a</sup> |                                     | General practice medical coding <sup>a</sup> |                                     |
|-------------------------------------|------------------------------------------------------|-------------------------------------|----------------------------------------------|-------------------------------------|
|                                     | Lowest fourth of general practices                   | Highest fourth of general practices | Lowest fourth of general practices           | Highest fourth of general practices |
| All                                 | 1.86 (1.83 to 1.88)                                  | 2.23 (2.20 to 2.25)                 | 1.94 (1.91 to 1.96)                          | 2.39 (2.37 to 2.42)                 |
| CNS Infection                       | 0.008 (0.007 to 0.010)                               | 0.009 (0.008 to 0.011)              | 0.008 (0.007 to 0.009)                       | 0.010 (0.009 to 0.012)              |
| CVS infection                       | 0.024 (0.021 to 0.027)                               | 0.026 (0.023 to 0.028)              | 0.026 (0.024 to 0.029)                       | 0.027 (0.025 to 0.030)              |
| Kidney Infection                    | 0.40 (0.39 to 0.41)                                  | 0.49 (0.48 to 0.50)                 | 0.37 (0.37 to 0.38)                          | 0.55 (0.53 to 0.56)                 |
| Lung abscess / empyema              | 0.042 (0.039 to 0.045)                               | 0.045 (0.042 to 0.049)              | 0.044 (0.041 to 0.047)                       | 0.049 (0.046 to 0.053)              |
| Mastoiditis                         | 0.025 (0.022 to 0.027)                               | 0.033 (0.030 to 0.036)              | 0.021 (0.019 to 0.023)                       | 0.036 (0.033 to 0.039)              |
| Osteomyelitis                       | 0.071 (0.067 to 0.075)                               | 0.073 (0.069 to 0.077)              | 0.071 (0.067 to 0.075)                       | 0.081 (0.077 to 0.086)              |
| Peritonsillar abscess               | 0.16 (0.15 to 0.17)                                  | 0.16 (0.16 to 0.17)                 | 0.14 (0.14 to 0.15)                          | 0.17 (0.17 to 0.18)                 |
| Resistant infections & C. difficile | 0.50 (0.49 to 0.51)                                  | 0.68 (0.67 to 0.69)                 | 0.63 (0.62 to 0.64)                          | 0.73 (0.72 to 0.74)                 |
| Sepsis                              | 0.57 (0.56 to 0.58)                                  | 0.65 (0.63 to 0.66)                 | 0.56 (0.55 to 0.57)                          | 0.67 (0.66 to 0.68)                 |
| Septic arthritis                    | 0.064 (0.059 to 0.068)                               | 0.064 (0.060 to 0.068)              | 0.057 (0.053 to 0.061)                       | 0.068 (0.064 to 0.072)              |

<sup>a</sup>quartiles were estimated from a hierarchical regression model adjusting for age-group, gender, comorbidity, region, deprivation and year

## Gulliford et al. Supplementary Data

**Supplementary Figure 3: Forest plot showing the adjusted rate ratio for each type of serious bacterial infection for 20% higher total AB prescribing (red) or repeat AB prescribing (grey). Estimates were adjusted for each variable shown and gender, age-group, comorbidity, deprivation fifth, region, year (including quadratic and cubic terms).**

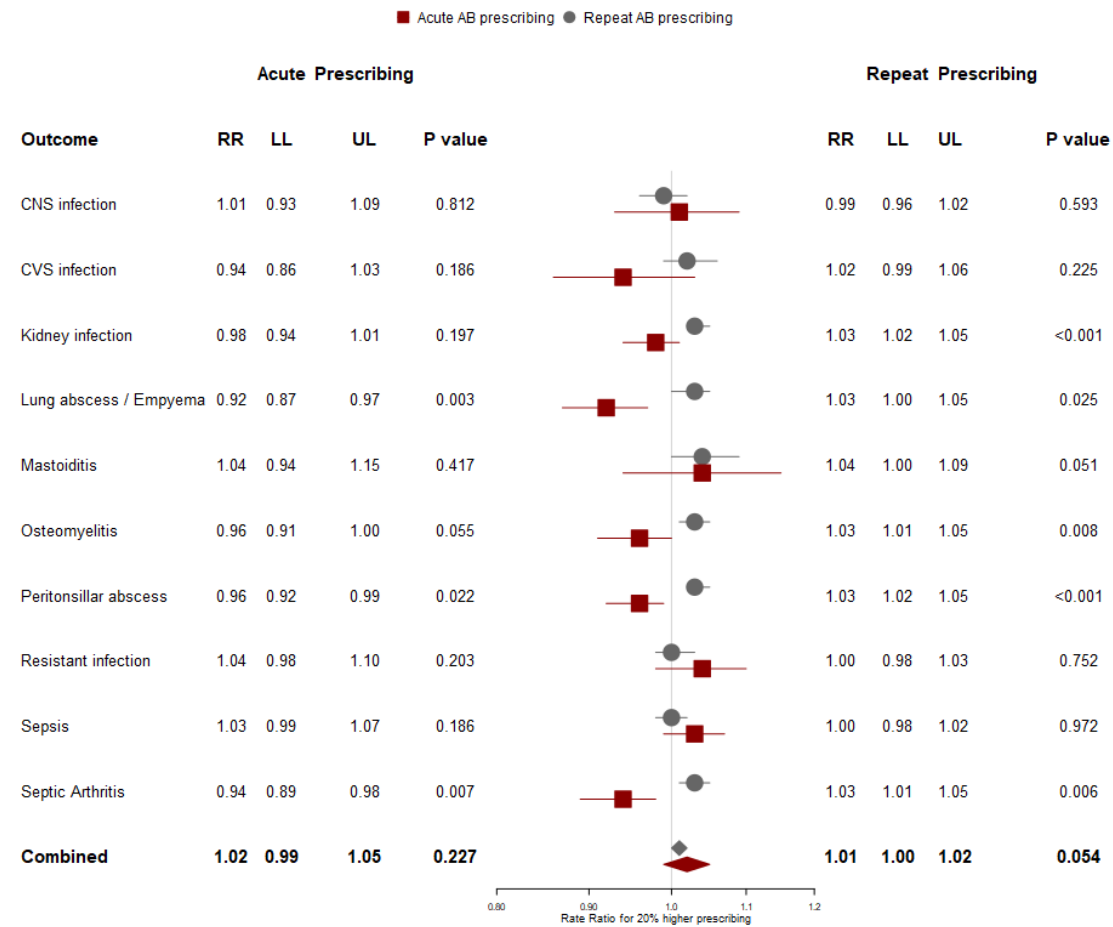

Supplement: inline-supplementary-material-1 [file inline-supplementary-material-1.pdf]
